# Supplementary material for: Social mindfulness predicts concern for nature and immigrants across 36 nations
Source: PubMed Central journal article supplement (PMC9772369; doi:10.1038/s41598-022-25538-y), 2022-12-21
Supplement: 41598_2022_25538_MOESM1_ESM.pdf [file 41598_2022_25538_MOESM1_ESM.pdf]

## Supplementary Materials

|                                                                                                                               |    |
|-------------------------------------------------------------------------------------------------------------------------------|----|
| <i>Supplementary Materials 1: Information by Country</i> .....                                                                | 2  |
| <i>Supplementary Materials 2: SoMi Measure</i> .....                                                                          | 4  |
| <i>Supplementary Materials 3: Individual-level variables for Part 1</i> .....                                                 | 8  |
| <i>Supplementary Materials 4: Country-level variables for Part 1</i> .....                                                    | 10 |
| <i>Supplementary Materials 5: Individual-level variables for Part 2</i> .....                                                 | 12 |
| <i>Supplementary Materials 6: Country-level variables for Part 2</i> .....                                                    | 16 |
| <i>Supplementary Materials 7: Full model results for Part 1</i> .....                                                         | 18 |
| <i>Supplementary Materials 8: Full model results for Part 2</i> .....                                                         | 29 |
| <i>Supplementary Materials 9: Within-Country and Between-Country Correlations<br/>for Part 2</i> .....                        | 40 |
| <i>Supplementary Materials 10: Results for Linear Mixed Model Containing all<br/>Country Level Variables for Part 2</i> ..... | 43 |
| <i>References</i> .....                                                                                                       | 45 |

## Supplementary Materials 1: Information by Country

**Table S1.** Countries, survey language, data collection method and total responses.

| <b>Country</b>      | <b>Survey Format</b>     | <b>Sample Size</b> | <b>Language</b> |
|---------------------|--------------------------|--------------------|-----------------|
| Australia           | Online                   | 386                | English         |
| Belgium             | Online                   | 225                | Dutch           |
| Brazil              | Online                   | 138                | Portuguese      |
| Canada              | Online                   | 183                | English         |
| Canada<br>(English) |                          |                    |                 |
| Canada<br>(French)  | Online                   | 135                | French          |
| Chile               | Online                   | 69                 | Spanish         |
| China               | Online                   | 235                | Chinese         |
| Colombia            | Online                   | 151                | Spanish         |
| Costa Rica          | Online                   | 130                | Spanish         |
| England             | Online                   | 149                | English         |
| Estonia             | Online                   | 63                 | Estonian        |
| France              | Online                   | 191                | French          |
| Germany             | Online                   | 143                | German          |
| Hong Kong           | Online                   | 211                | English         |
| Italy               | Online                   | 222                | Italian         |
| Japan               | Online                   | 182                | Japanese        |
| Latvia              | Paper & Pencil           | 120                | Latvian         |
| Macedonia           | Online                   | 124                | Macedonian      |
| Malaysia            | Online                   | 175                | Malay           |
| Netherlands         | Online                   | 110                | Dutch           |
| New Zealand         | Online                   | 134                | English         |
| Nigeria             | Paper & Pencil           | 233                | English         |
| Northern<br>Ireland | Online                   | 110                | English         |
| Pakistan            | Online                   | 147                | English         |
| Peru                | Online                   | 200                | Spanish         |
| Philippines         | Online/Paper &<br>Pencil | 151                | English         |
| Poland              | Paper & Pencil           | 116                | Polish          |
| Portugal            | Online/Paper &<br>Pencil | 137                | Portuguese      |
| Scotland            | Online                   | 110                | English         |
| Singapore           | Online                   | 102                | English         |
| Slovakia            | Paper & Pencil           | 115                | Slovak          |
| South Africa        | Other(online)            | 423                | English         |
| South Korea         | Other(online)            | 127                | Korean          |
| Spain               | Online                   | 156                | Spanish         |

|             |                |     |           |
|-------------|----------------|-----|-----------|
| Thailand    | Paper & Pencil | 99  | Thai      |
| Turkey      | Online         | 275 | Turkish   |
| Uganda      | Online         | 101 | English   |
| Ukraine     | Paper & Pencil | 110 | Ukrainian |
| USA (North) | Online         | 181 | English   |
| USA (South) | Online         | 211 | English   |
| Wales       | Online         | 85  | English   |

---

## Supplementary Materials 2: SoMi Measure

<sup>1</sup>The task you are about to do involves two people; you and someone else. Imagine that the other person is someone you haven't met before, and will not knowingly meet again in the future (because you will not get to know or see each other in person).

Also imagine that you both get to choose one of the objects that are shown on the paper. There are only a few objects left. Once taken, these will not be replaced. In this task, you always get to choose first. You will have to make several choices.

So to summarize:

**You and someone else can each choose one among the products shown on the paper.**

**It is important to remember that you always choose first!**

→ *Make your choice by circling the number under the product you would like to take.*

---

First, here's an example. Which of these objects would you take? You pick first, then the other!

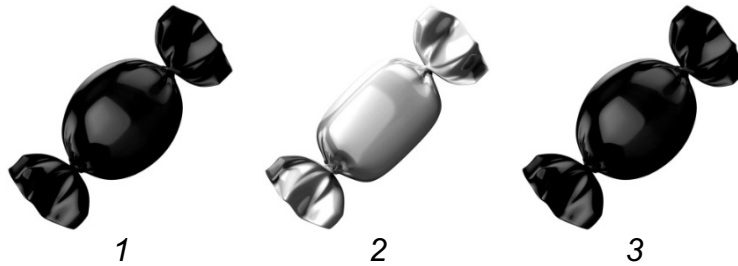

---

**Now turn the page to start the task.**

**Remember that there's two of you, and that you always choose first!**  
Which of these objects would you take? You pick first, then the other person!

1

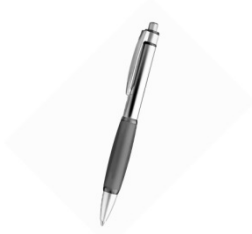

1

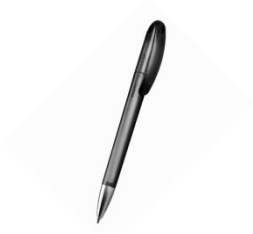

2

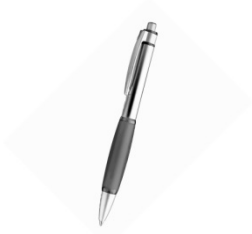

3



4

2

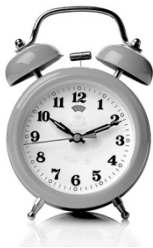

1

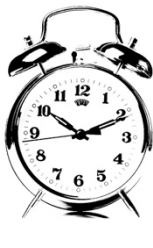

2

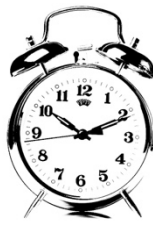

3

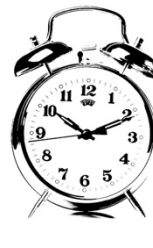

4

3

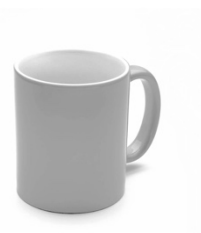

1

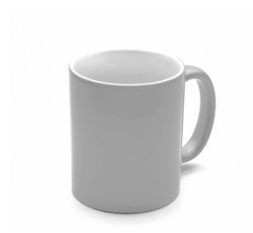

2

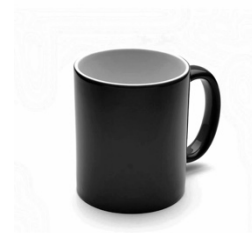

3

4

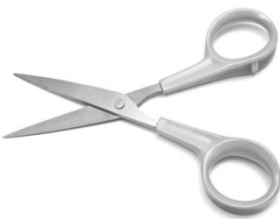

1

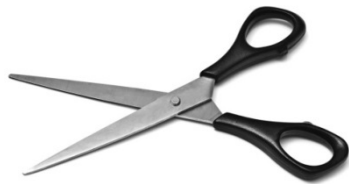

2

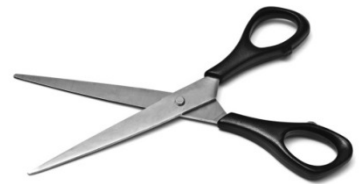

3

5

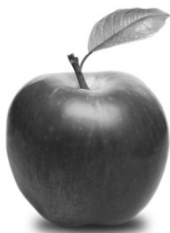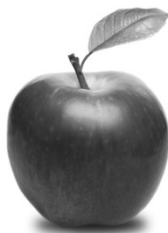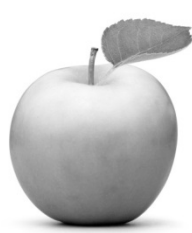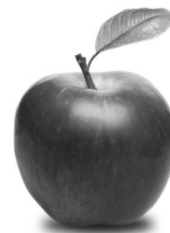

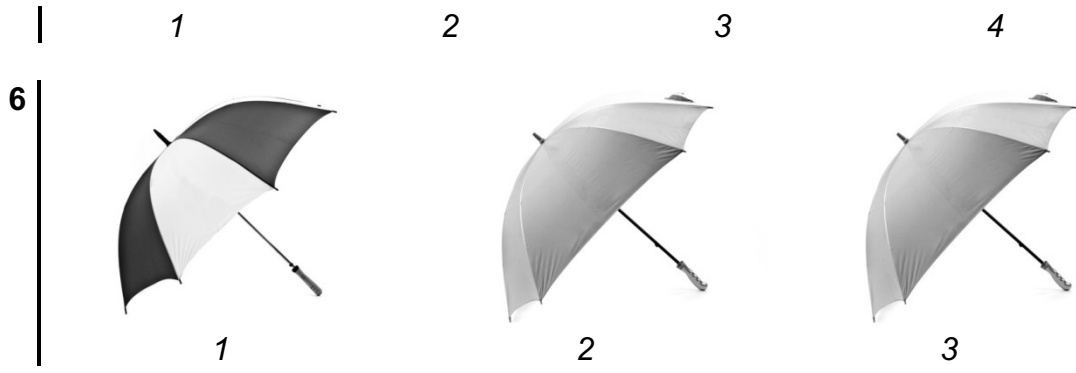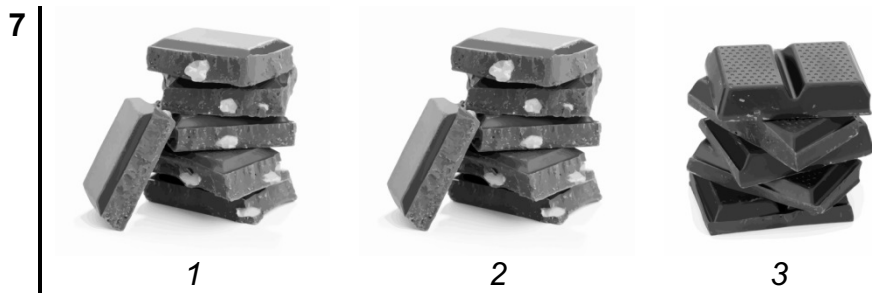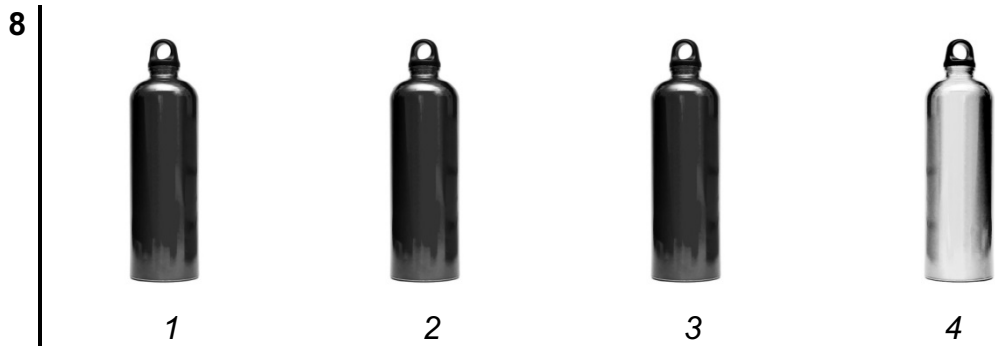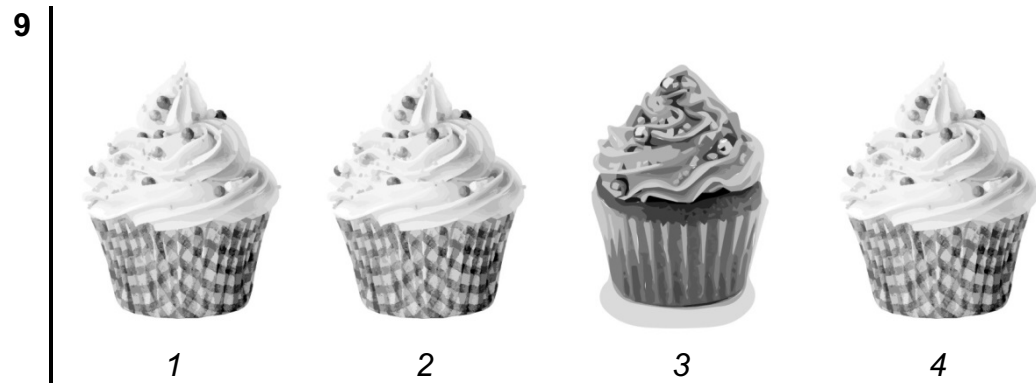

10

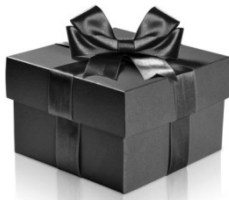

1

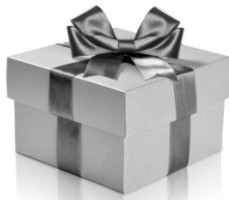

2

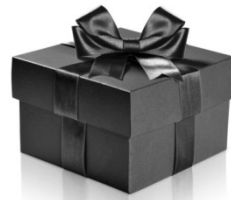

3

11

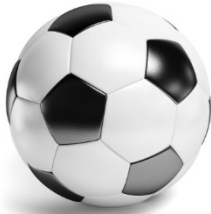

1

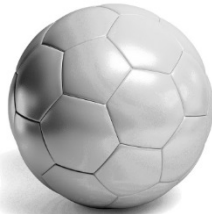

2

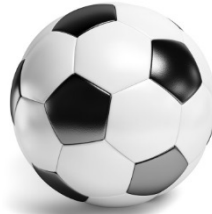

3

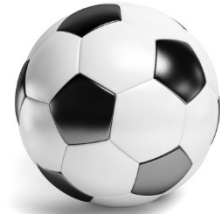

4

12

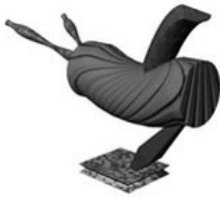

1

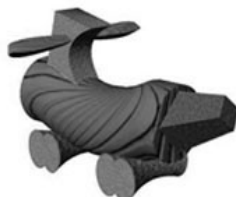

2

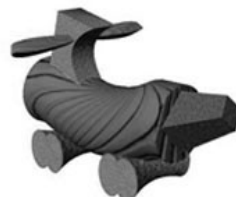

3

### Supplementary Materials 3: Individual-level variables for Part 1

#### Age

- Age (in years): \_\_\_\_\_

#### Gender

- Gender: \_\_\_\_\_

#### Trust in others<sup>2</sup>

1. I dare to put my fate in the hands of most other people
2. I completely trust most other people
3. When push comes to shove, I do not trust most other people – reverse coded

Responses were recorded on a scale from 1 (*completely disagree*) to 7 (*completely agree*) and an average score for all items was calculated.

#### Others trust in you<sup>2</sup>

1. I think that most other people dare to put their fate in my hands
2. I think that most other people trust me
3. When push comes to shove, most other people do not trust me – reverse coded

Responses were recorded on a scale from 1 (*completely disagree*) to 7 (*completely agree*) and an average score for all items was calculated.

#### Economic conservatism

- Please indicate your political beliefs from left/liberal to right/conservative on issues of the economy (e.g., social welfare, government spending, tax cuts):

Responses were recorded on a scale from 1 (*left/liberal*) to 7 (*right/conservative*).

#### Social conservatism

- Please indicate your political beliefs from left/liberal to right/conservative on social issues (e.g., immigration, homosexual marriage, abortion):

Responses were recorded on a scale from 1 (*left/liberal*) to 7 (*right/conservative*)

#### MacArthur Scale of Subjective Socioeconomic Status<sup>3</sup>

- Think of this ladder as representing where people stand in <country>. At the top of the ladder are the people who have the most money, most education, and most respected jobs. At the bottom are the people who have the least money, least education, and least respected jobs or no job. The higher up you are on this ladder, the closer you are to the people at



the very top, and the lower you are, the closer you are to the people at the very bottom. Where would you place yourself on this ladder? Please select a number corresponding to the rung where you think you stand at this time in your life, relative to other people in <country>.

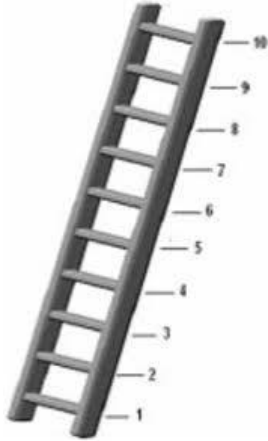

Responses were recorded on a scale from 1 (*least money, job prestige and education*) to 10 (*most money, job prestige and education*)

## Supplementary Materials 4: Country-level variables for Part 1

**Table S2.** Country level variables and associated sources for Part 1

| Variable                     | Description                                                                                                                                                                                                                                                                                                                                             | Source                                                                                                                                                                                         |
|------------------------------|---------------------------------------------------------------------------------------------------------------------------------------------------------------------------------------------------------------------------------------------------------------------------------------------------------------------------------------------------------|------------------------------------------------------------------------------------------------------------------------------------------------------------------------------------------------|
| Trust                        | “Most people can be trusted” – recoded to 1 ( <i>need to be very careful</i> ) or 2 ( <i>most people can be trusted</i> )                                                                                                                                                                                                                               | World Values Survey (Wave 6) <sup>4</sup> and European Values Survey (2017) <sup>5</sup>                                                                                                       |
| Religiosity                  | “Important in life: Religion” – recoded to 1 ( <i>not at all important</i> ) to 4 ( <i>very important</i> )                                                                                                                                                                                                                                             | World Values Survey (Wave 6) <sup>4</sup> and European Values Survey (2017) <sup>5</sup>                                                                                                       |
| Civic Cooperation            | <p>“How justifiable is it to:</p> <ol style="list-style-type: none"> <li>1. Cheat on taxes</li> <li>2. Not pay for a public bus fare</li> <li>3. Claim government benefits you aren’t entitled to”</li> </ol> <p>Average of responses from all three questions on a scale recoded to 1 (<i>always justifiable</i>) to 10 (<i>never justifiable</i>)</p> | World Values Survey (Wave 6) <sup>4</sup> and European Values Survey (2017) <sup>5</sup>                                                                                                       |
| Rule of Law                  | A measure for the confidence individuals have in the rules of society as well as the likelihood those individuals abide by those rules. Scores range from -2.5 ( <i>weak rule of law</i> ) to 2.5 ( <i>strong rule of law</i> )                                                                                                                         | <a href="https://databank.worldbank.org/source/worldwide-governance-indicators/preview/on#">https://databank.worldbank.org/source/worldwide-governance-indicators/preview/on#</a> <sup>6</sup> |
| Democracy                    | The state of democracy in the country, measuring pluralism, civil liberties and political culture. Measured from 0 ( <i>least democratic</i> ) to 10 ( <i>most democratic</i> )                                                                                                                                                                         | Economist Intelligence Unit<br><a href="https://www.eiu.com/n/campaigns/democracy-index-2020/">https://www.eiu.com/n/campaigns/democracy-index-2020/</a> <sup>7</sup>                          |
| Global Competitiveness Index | A compilation of 12 facets of competitiveness. A scale from 0 ( <i>less competitiveness</i> ) to 100 ( <i>more competitiveness</i> )                                                                                                                                                                                                                    | <a href="http://www3.weforum.org/docs/WEF_TheGlobalCompetitivenessReport2019.pdf">http://www3.weforum.org/docs/WEF_TheGlobalCompetitivenessReport2019.pdf</a> <sup>8</sup>                     |

|                                       |                                                                                                                                          |                                                                                                                                                                                                                                                                       |
|---------------------------------------|------------------------------------------------------------------------------------------------------------------------------------------|-----------------------------------------------------------------------------------------------------------------------------------------------------------------------------------------------------------------------------------------------------------------------|
| World Press Freedom Index             | Degree of freedom available to journalists in the country. Measured from 0 ( <i>least freedom</i> ) to 100 ( <i>most freedom</i> )       | <a href="https://rsf.org/en/index">https://rsf.org/en/index</a> <sup>9</sup>                                                                                                                                                                                          |
| Environmental Performance Index (EPI) | Rank of performance on 24 environmental health indicators. Ranked from 0 ( <i>worst performance</i> ) to 100 ( <i>best performance</i> ) | <a href="http://epi.yale.edu">http://epi.yale.edu</a> <sup>10</sup>                                                                                                                                                                                                   |
| Hofstede's Cultural Dimensions        | Six cultural dimensions: Power Distance, Individualism, Masculinity, Uncertainty Avoidance, Long Term Orientation, and Indulgence        | <a href="https://www.hofstede-insights.com/product/comparison-countries/">https://www.hofstede-insights.com/product/comparison-countries/</a> <sup>11</sup>                                                                                                           |
| GNI per capita                        | The income of a country per year divided by the number of people in that country in US\$                                                 | <a href="https://data.worldbank.org/indicator/NY.GNP.PCAP.CD">https://data.worldbank.org/indicator/NY.GNP.PCAP.CD</a> <sup>12</sup>                                                                                                                                   |
| GDP per capita                        | The economic output of a country per year divided by the number of people in that country in US\$                                        | <a href="https://data.worldbank.org/indicator/NY.GDP.PCAP.CD">https://data.worldbank.org/indicator/NY.GDP.PCAP.CD</a> <sup>13</sup>                                                                                                                                   |
| Gini Index                            | A measure of economic inequality in a country. The index ranges from 0 (perfect equality) to 100 (perfect inequality)                    | <a href="https://www.cia.gov/the-world-factbook/field/gini-index-coefficient-distribution-of-family-income/country-comparison">https://www.cia.gov/the-world-factbook/field/gini-index-coefficient-distribution-of-family-income/country-comparison</a> <sup>14</sup> |

---

## Supplementary Materials 5: Individual-level variables for Part 2

### Moral Expansiveness Scale <sup>15</sup>

People sometimes talk about '***circles of moral concern***'. These circles are simple ways to make sense of the *levels of moral consideration we have for different entities* (e.g., people, animals, and the environment).

**Where we place these entities within our moral circles is important and has direct consequences for how we treat them.** For example, you might have close family or friends that are central to your moral world, this means you would be willing to make personal sacrifices for them. However, if we do not include an entity within our moral circles, this means we do not believe they are deserving of moral care and consideration, and wouldn't want to make sacrifices for them.

On the following page you are given the opportunity to organise a range of entities and place them within your own moral circles that reflect your individual views and feelings.

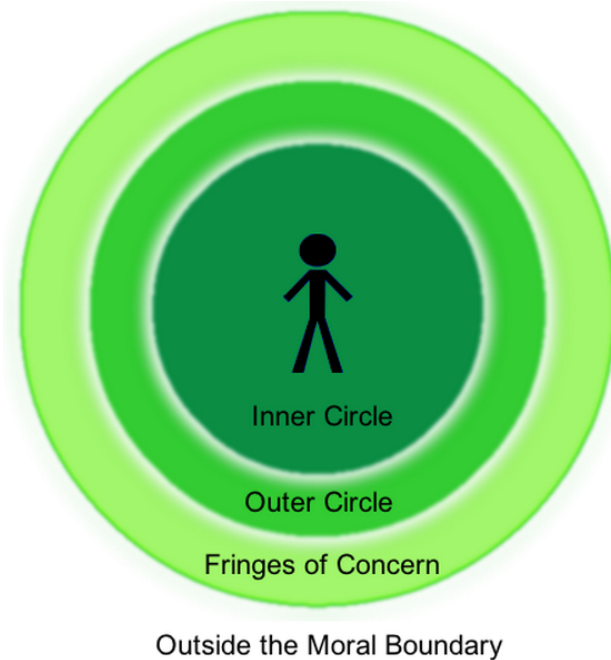

*Please read the four moral boundary descriptions below before completing the moral circle task.*

- **Inner Circle of Moral Concern:** These entities deserve the **highest level of moral concern and standing**. You have a moral obligation to ensure their welfare and feel a sense of personal responsibility for their treatment.

- **Outer Circle of Moral Concern:** These entities deserve **moderate moral concern and standing**. You are concerned about their moral treatment; however, your sense of obligation and personal responsibility is greatly reduced.
- **Fringes of Moral Concern:** These entities deserve **minimal moral concern and standing**, but you are not morally obligated or personally responsible for their moral treatment.
- **Outside the Moral Boundary:** These entities deserve **no moral concern or standing**. Feeling concern or personal responsibility for their moral treatment is extreme or nonsensical.

Having carefully read these descriptions, please consider the **level of moral concern you have for each of the entities below and select the appropriate moral circle placement**. Please note, there are no right or wrong answers – we just want to know your opinion.

- Rose bush
- Elected leader of your country (position, not specific individual)
- Close friend
- Mentally challenged individual
- Supporter of opposing political party
- Soldier of your country
- Fish
- Charity worker
- Terrorist
- Refugee
- Foreign citizen
- Chicken
- Partner/spouse
- Somebody with different religious beliefs
- Murderer
- Apple tree
- Co-worker
- Old-growth forest
- Bee
- Chimpanzee
- Homosexual
- Coral reef
- Redwood tree
- National park
- Somebody from your neighborhood
- Citizen of your country
- Cow

- Child molester
- Dolphin
- Family member

Responses are coded as 3 (*inner circle of moral concern*), 2 (*outer circle of moral concern*), 1 (*fringes of moral concern*) or 0 (*outside the moral boundary*). Responses to each entity are added together to create a total moral expansiveness score between 0 (*least morally expansive*) to 90 (*most morally expansive*).

#### Attitudes towards immigrants <sup>16</sup>

1. Immigrants take resources and employment opportunities away from <Country>
2. In schools where there are too many children of immigrants, the quality of education will suffer
3. Immigrants abuse the system of social benefits
4. <Country> norms and values are being threatened by the presence of immigrants
5. The cultural practices of immigrants threaten the <Country> way of life
6. Immigrants are a threat to the <Country> identity

Responses were recorded on a scale from 1 (*strongly disagree*) to 7 (*strongly agree*) and an average score for all items was calculated.

#### Schwartz 'Universalism' Value <sup>17</sup>

The next questionnaire asks about the things you personally value in life. Please answer in the space to the left of each item. First read the list of values below and choose the value that is most important to you and rate it **7**. Next, choose the value that is opposed to what you value and rate it **-1**. If there is no such value, choose the value least important to you and rate it **0** or **1**, according to its importance. **Then rate the rest of the values in the list:**

- Universalism, that is, equality, a world at peace, wisdom, social justice, broadmindedness, to enjoy the beauty of nature and the arts, to feel unity with nature and to protect the environment

Responses were recorded on a scale from -1 (*opposed to my principles*) to 7 (*very important*)

#### Perceptions of anomie <sup>18,19</sup>

- Social anomie
  1. People think that there are no clear moral standards to follow
  2. Everyone thinks of himself/herself and does not help others in need
  3. Most of people think that if something works, it doesn't really matter whether it is right or wrong
  4. People do not know who they can trust and rely on

- 5. Most of the people think that honesty doesn't work all the time; dishonesty is sometimes a better approach to get ahead
- 6. People are cooperative – reverse coded
- Government anomie
  - 1. The government works towards the welfare of people – reverse coded
  - 2. The government is legitimate – reverse coded
  - 3. The government uses its power legitimately – reverse coded
  - 4. Politicians don't care about the problems of average person
  - 5. The government laws and policies are effective – reverse coded
  - 6. Some laws are not fair

Responses were recorded on a scale from 1 (*strongly disagree*) to 7 (*strongly agree*) and an average score for all items was calculated to achieve a total anomie score. We calculated separate averages to achieve a social anomie and government anomie score.

Schwartz 'Benevolence' Value <sup>17</sup>

The next questionnaire asks about the things you personally value in life. Please answer in the space to the left of each item. First read the list of values below and choose the value that is most important to you and rate it **7**. Next, choose the value that is opposed to what you value and rate it **-1**. If there is no such value, choose the value least important to you and rate it **0** or **1**, according to its importance. **Then rate the rest of the values in the list:**

- Benevolence, that is, to be loyal, honest, helpful, responsible, and forgiving

Responses were recorded on a scale from -1 (*opposed to my principles*) to 7 (*very important*)

## Supplementary Materials 6: Country-level variables for Part 2

**Table S3.** Country level variables and associated sources for Part 2

| <b>Variable</b>                  | <b>Description</b>                                                                                                                                                                                                                                                                                                                                                  | <b>Source</b>                                                                                                                                                                                           |
|----------------------------------|---------------------------------------------------------------------------------------------------------------------------------------------------------------------------------------------------------------------------------------------------------------------------------------------------------------------------------------------------------------------|---------------------------------------------------------------------------------------------------------------------------------------------------------------------------------------------------------|
| Environmental Care               | A sub-measure of the Citizenship Index from the US News Best Country measures. This provides a score for how much care a country puts into the environment. Ranked from 0 ( <i>worst performance</i> ) to 100 ( <i>best performance</i> )                                                                                                                           | <a href="https://www.usnews.com/news/best-countries/citizenship-rankings">https://www.usnews.com/news/best-countries/citizenship-rankings</a> <sup>20</sup>                                             |
| Minorities as neighbors          | Participants asked what categories of people they would not like to have as neighbors from: people of a different race, heavy drinkers, immigrants/foreign workers, drug addicts, homosexuals. Responses are recorded for each category as 1 (mentioned) or 2 (not mentioned) and an average was obtained. Higher values indicate greater tolerance for minorities. | World Values Survey (Wave 6) <sup>4</sup> and European Values Survey (2017) <sup>5</sup>                                                                                                                |
| Child quality: tolerance/respect | Participants are given a list of qualities children are encouraged to learn at home. They are asked to indicate five that they believe are important, including 'tolerance/respect' as an option. Recoded as 1 ( <i>not mentioned</i> ) or 2 ( <i>mentioned</i> ). Higher scores indicate greater value placed on this trait.                                       | World Values Survey (Wave 6) <sup>4</sup> and European Values Survey (2017) <sup>5</sup>                                                                                                                |
| Trust                            | Percentage of individuals who think most people can be trusted. Obtained from Our World in Data.                                                                                                                                                                                                                                                                    | <a href="https://ourworldindata.org/trust">https://ourworldindata.org/trust</a> <sup>21</sup>                                                                                                           |
| Social Capital Index             | A collated measure of five indices of social capital: health, equality, crime, freedom, and satisfaction. Higher values indicate more social capital. Obtained from the Global Sustainable Competitiveness Index.                                                                                                                                                   | <a href="https://solability.com/the-global-sustainable-competitiveness-index/the-index/social-capital">https://solability.com/the-global-sustainable-competitiveness-index/the-index/social-capital</a> |

22



|                                  |                                                                                                                                                                                                                                                                                                                                                                                                                        |                                                                                                                                                                   |
|----------------------------------|------------------------------------------------------------------------------------------------------------------------------------------------------------------------------------------------------------------------------------------------------------------------------------------------------------------------------------------------------------------------------------------------------------------------|-------------------------------------------------------------------------------------------------------------------------------------------------------------------|
| Citizenship Index                | <p>From the US News Best Country measures. The Citizenship Index provides a measure of positive global citizenship by collating the following measures: well-distributed political power, cares about the environment, gender equality, cares about human rights, progressive, respects property rights, religious freedom, trustworthy. Ranked from 0 (<i>worst performance</i>) to 100 (<i>best performance</i>)</p> | <p><a href="https://www.usnews.com/news/best-countries/citizenship-rankings">https://www.usnews.com/news/best-countries/citizenship-rankings</a><sup>20</sup></p> |
| Voice & Accountability of people | <p>A worldwide governance indicator subscale from the World Bank. The measure assesses citizen participation in government and freedom of expression. Scores approximately range between -2 (<i>worst performance</i>) to 2 (<i>best performance</i>)</p>                                                                                                                                                              | <p><a href="http://info.worldbank.org/governance/wgi/">http://info.worldbank.org/governance/wgi/</a><sup>23</sup></p>                                             |
| Collective action                | <p>Have participants engaged in these behaviors:</p> <ol style="list-style-type: none"> <li>1. Signed a petition</li> <li>2. Attended a peaceful protest</li> </ol> <p>Average of responses from both questions were recoded on a scale from 1 (<i>would never do</i>), 2 (<i>might do</i>) 3 (<i>have done</i>). Higher values indicate more collective action.</p>                                                   | <p>World Values Survey (Wave 6)<sup>4</sup> and European Values Survey (2017)<sup>5</sup></p>                                                                     |
| Child quality: unselfishness     | <p>Participants are given a list of qualities children are encouraged to learn at home. They are asked to indicate five that they believe are important, including 'unselfishness' as an option. Recoded as 1 (<i>not mentioned</i>) or 2 (<i>mentioned</i>). Higher scores indicate greater value placed on this trait.</p>                                                                                           | <p>World Values Survey (Wave 6)<sup>4</sup> and European Values Survey (2017)<sup>5</sup></p>                                                                     |

---

**Supplementary Materials 7: Full model results for Part 1**

**Table S4.** Relationship between social mindfulness and age.

| <i>Predictors</i>                                    | <b>Social Mindfulness</b> |             |          |
|------------------------------------------------------|---------------------------|-------------|----------|
|                                                      | <i>Estimates</i>          | <i>CI</i>   | <i>p</i> |
| (Intercept)                                          | -0.00                     | -0.32, 0.32 | .992     |
| Age (within countries)                               | 0.01                      | -0.01, 0.04 | .295     |
| Age (between countries)                              | 0.12                      | -0.20, 0.44 | .460     |
| <b>Random Effects</b>                                |                           |             |          |
| Residual                                             | 1.00                      |             |          |
| Country (intercept)                                  | 1.00                      |             |          |
| ICC                                                  | .50                       |             |          |
| N (Country)                                          | 41                        |             |          |
| Observations                                         | 6153                      |             |          |
| Marginal R <sup>2</sup> / Conditional R <sup>2</sup> | .006 / .505               |             |          |

**Table S5.** Relationship between social mindfulness and subjective social status.

| <i>Predictors</i>                                    | <b>Social Mindfulness</b> |             |          |
|------------------------------------------------------|---------------------------|-------------|----------|
|                                                      | <i>Estimates</i>          | <i>CI</i>   | <i>p</i> |
| (Intercept)                                          | 0.00                      | -0.31, 0.32 | .989     |
| Subjective social status (within countries)          | 0.00                      | -0.02, 0.03 | .773     |
| Subjective social status (between countries)         | 0.17                      | -0.15, 0.49 | .283     |
| <b>Random Effects</b>                                |                           |             |          |
| Residual                                             | 1.00                      |             |          |
| Country (intercept)                                  | 0.99                      |             |          |
| ICC                                                  | .50                       |             |          |
| N (Country)                                          | 41                        |             |          |
| Observations                                         | 6125                      |             |          |
| Marginal R <sup>2</sup> / Conditional R <sup>2</sup> | .015 / .507               |             |          |

**Table S6.** Relationship between social mindfulness and gender.

| <i>Predictors</i>                                    | <b>Social Mindfulness</b> |             |          |
|------------------------------------------------------|---------------------------|-------------|----------|
|                                                      | <i>Estimates</i>          | <i>CI</i>   | <i>p</i> |
| (Intercept)                                          | 0.03                      | -0.24, 0.30 | .817     |
| Gender (within countries)                            | -0.01                     | -0.03, 0.02 | .543     |
| Gender (between countries)                           | 0.61                      | 0.33, 0.89  | <.001    |
| <b>Random Effects</b>                                |                           |             |          |
| Residual                                             | 1.00                      |             |          |
| Country (intercept)                                  | 0.68                      |             |          |
| ICC                                                  | .41                       |             |          |
| N (Country)                                          | 40                        |             |          |
| Observations                                         | 6055                      |             |          |
| Marginal R <sup>2</sup> / Conditional R <sup>2</sup> | .203 / .527               |             |          |

**Table S7.** Relationship between social mindfulness and economic conservatism.

| <i>Predictors</i>                                    | <b>Social Mindfulness</b> |              |          |
|------------------------------------------------------|---------------------------|--------------|----------|
|                                                      | <i>Estimates</i>          | <i>CI</i>    | <i>p</i> |
| (Intercept)                                          | -0.00                     | -0.28, 0.28  | .988     |
| Economic conservatism (within countries)             | -0.05                     | -0.07, -0.02 | <.001    |
| Economic conservatism (between countries)            | -0.50                     | -0.78, -0.21 | .001     |
| <b>Random Effects</b>                                |                           |              |          |
| Residual                                             | 1.00                      |              |          |
| Country (intercept)                                  | 0.77                      |              |          |
| ICC                                                  | .44                       |              |          |
| N (Country)                                          | 41                        |              |          |
| Observations                                         | 6143                      |              |          |
| Marginal R <sup>2</sup> / Conditional R <sup>2</sup> | .120 / .503               |              |          |

**Table S8.** Relationship between social mindfulness and social conservatism.

| <i>Predictors</i>                                    | <b>Social Mindfulness</b> |              |          |
|------------------------------------------------------|---------------------------|--------------|----------|
|                                                      | <i>Estimates</i>          | <i>CI</i>    | <i>p</i> |
| (Intercept)                                          | -0.00                     | -0.25, 0.25  | 0.987    |
| Social conservatism (within countries)               | -0.03                     | -0.06, -0.01 | .010     |
| Social conservatism (between countries)              | -0.63                     | -0.88, -0.38 | <.001    |
| <b>Random Effects</b>                                |                           |              |          |
| Residual                                             | 1.00                      |              |          |
| Country (intercept)                                  | 0.61                      |              |          |
| ICC                                                  | .38                       |              |          |
| N (Country)                                          | 41                        |              |          |
| Observations                                         | 6142                      |              |          |
| Marginal R <sup>2</sup> / Conditional R <sup>2</sup> | .182 / .493               |              |          |

**Table S9.** Relationship between social mindfulness and trust in others.

| <i>Predictors</i>                                    | <b>Social Mindfulness</b> |             |          |
|------------------------------------------------------|---------------------------|-------------|----------|
|                                                      | <i>Estimates</i>          | <i>CI</i>   | <i>p</i> |
| (Intercept)                                          | 0.00                      | -0.31, 0.32 | .993     |
| Trust in others (within countries)                   | 0.05                      | 0.02, 0.07  | <.001    |
| Trust in others (between countries)                  | 0.20                      | -0.12, 0.52 | .210     |
| <b>Random Effects</b>                                |                           |             |          |
| Residual                                             | 0.99                      |             |          |
| Country (intercept)                                  | 0.98                      |             |          |
| ICC                                                  | .50                       |             |          |
| N (Country)                                          | 41                        |             |          |
| Observations                                         | 6176                      |             |          |
| Marginal R <sup>2</sup> / Conditional R <sup>2</sup> | .022 / .507               |             |          |

**Table S10.** Relationship between social mindfulness and others trust in self.

| <i>Predictors</i> | <b>Social Mindfulness</b> |           |          |
|-------------------|---------------------------|-----------|----------|
|                   | <i>Estimates</i>          | <i>CI</i> | <i>p</i> |

|                                          |      |             |      |
|------------------------------------------|------|-------------|------|
| (Intercept)                              | 0.00 | -0.31, 0.32 | .991 |
| Others trust in self (within countries)  | 0.03 | 0.00, 0.05  | .037 |
| Others trust in self (between countries) | 0.19 | -0.13, 0.50 | .244 |

**Random Effects**

|                                                      |             |
|------------------------------------------------------|-------------|
| Residual                                             | 1.00        |
| Country (intercept)                                  | 0.98        |
| ICC                                                  | .50         |
| N (Country)                                          | 41          |
| Observations                                         | 6173        |
| Marginal R <sup>2</sup> / Conditional R <sup>2</sup> | .017 / .505 |

**Table S11.** Relationship between social mindfulness and trust (WVS).

| <i>Predictors</i> | <b>Social Mindfulness</b> |             |          |
|-------------------|---------------------------|-------------|----------|
|                   | <i>Estimates</i>          | <i>CI</i>   | <i>p</i> |
| (Intercept)       | -0.06                     | -0.40, 0.28 | .733     |
| Trust (WVS)       | 0.39                      | 0.05, 0.74  | .026     |

**Random Effects**

|                                                      |             |
|------------------------------------------------------|-------------|
| Residual                                             | 1.00        |
| Country (intercept)                                  | 0.97        |
| ICC                                                  | .49         |
| N (Country)                                          | 35          |
| Observations                                         | 5367        |
| Marginal R <sup>2</sup> / Conditional R <sup>2</sup> | .076 / .530 |

**Table S12.** Relationship between social mindfulness and importance of religion.

| <i>Predictors</i> | <b>Social Mindfulness</b> |              |          |
|-------------------|---------------------------|--------------|----------|
|                   | <i>Estimates</i>          | <i>CI</i>    | <i>p</i> |
| (Intercept)       | -0.06                     | -0.34, 0.22  | .677     |
| Religiosity       | -0.68                     | -0.97, -0.40 | <.001    |

**Random Effects**

|                                                      |             |
|------------------------------------------------------|-------------|
| Residual                                             | 1.00        |
| Country (intercept)                                  | 0.65        |
| ICC                                                  | .39         |
| N (Country)                                          | 35          |
| <hr/>                                                |             |
| Observations                                         | 5367        |
| Marginal R <sup>2</sup> / Conditional R <sup>2</sup> | .230 / .533 |
| <hr/>                                                |             |

**Table S13.** Relationship between social mindfulness and civic cooperation.

| <i>Predictors</i> | <b>Social Mindfulness</b> |             |          |
|-------------------|---------------------------|-------------|----------|
|                   | <i>Estimates</i>          | <i>CI</i>   | <i>p</i> |
| (Intercept)       | -0.06                     | -0.41, 0.29 | .741     |
| Civic Cooperation | 0.31                      | -0.04, 0.67 | .080     |

**Random Effects**

|                                                      |             |
|------------------------------------------------------|-------------|
| Residual                                             | 1.00        |
| Country (intercept)                                  | 1.03        |
| ICC                                                  | .51         |
| N (Country)                                          | 35          |
| <hr/>                                                |             |
| Observations                                         | 5367        |
| Marginal R <sup>2</sup> / Conditional R <sup>2</sup> | .065 / .539 |
| <hr/>                                                |             |

**Table S14.** Relationship between social mindfulness and rule of law.

| <i>Predictors</i> | <b>Social Mindfulness</b> |             |          |
|-------------------|---------------------------|-------------|----------|
|                   | <i>Estimates</i>          | <i>CI</i>   | <i>p</i> |
| (Intercept)       | -0.00                     | -0.28, 0.28 | .994     |
| Rule of Law       | 0.50                      | 0.22, 0.78  | .001     |

**Random Effects**

|                     |      |
|---------------------|------|
| Residual            | 1.00 |
| Country (intercept) | 0.76 |
| ICC                 | .43  |

|                                                      |             |
|------------------------------------------------------|-------------|
| N (Country)                                          | 41          |
| Observations                                         | 6190        |
| Marginal R <sup>2</sup> / Conditional R <sup>2</sup> | .127 / .505 |

**Table S15.** Relationship between social mindfulness and democracy.

| <b>Social Mindfulness</b>                            |                  |             |          |
|------------------------------------------------------|------------------|-------------|----------|
| <i>Predictors</i>                                    | <i>Estimates</i> | <i>CI</i>   | <i>p</i> |
| (Intercept)                                          | -0.00            | -0.29, 0.29 | .995     |
| Democracy                                            | 0.44             | 0.14, 0.73  | .004     |
| <b>Random Effects</b>                                |                  |             |          |
| Residual                                             | 1.00             |             |          |
| Country (intercept)                                  | 0.82             |             |          |
| ICC                                                  | .45              |             |          |
| N (Country)                                          | 41               |             |          |
| Observations                                         | 6190             |             |          |
| Marginal R <sup>2</sup> / Conditional R <sup>2</sup> | .109 / .512      |             |          |

**Table S16.** Relationship between social mindfulness and competitiveness.

| <b>Social Mindfulness</b>                            |                  |             |          |
|------------------------------------------------------|------------------|-------------|----------|
| <i>Predictors</i>                                    | <i>Estimates</i> | <i>CI</i>   | <i>p</i> |
| (Intercept)                                          | -0.00            | -0.29, 0.29 | .993     |
| Competitiveness Index                                | 0.45             | 0.15, 0.74  | .004     |
| <b>Random Effects</b>                                |                  |             |          |
| Residual                                             | 1.00             |             |          |
| Country (intercept)                                  | 0.82             |             |          |
| ICC                                                  | .45              |             |          |
| N (Country)                                          | 41               |             |          |
| Observations                                         | 6190             |             |          |
| Marginal R <sup>2</sup> / Conditional R <sup>2</sup> | .095 / .502      |             |          |

**Table S17.** Relationship between social mindfulness and press freedom.

| <b>Social Mindfulness</b>                            |                  |             |          |
|------------------------------------------------------|------------------|-------------|----------|
| <i>Predictors</i>                                    | <i>Estimates</i> | <i>CI</i>   | <i>p</i> |
| (Intercept)                                          | -0.00            | -0.30, 0.30 | .996     |
| Press Freedom                                        | 0.36             | 0.06, 0.66  | .021     |
| <b>Random Effects</b>                                |                  |             |          |
| Residual                                             | 1.00             |             |          |
| Country (intercept)                                  | 0.89             |             |          |
| ICC                                                  | .47              |             |          |
| N (Country)                                          | 41               |             |          |
| Observations                                         | 6190             |             |          |
| Marginal R <sup>2</sup> / Conditional R <sup>2</sup> | .073 / .509      |             |          |

**Table S18.** Relationship between social mindfulness and EPI.

| <b>Social Mindfulness</b>                            |                  |             |          |
|------------------------------------------------------|------------------|-------------|----------|
| <i>Predictors</i>                                    | <i>Estimates</i> | <i>CI</i>   | <i>p</i> |
| (Intercept)                                          | -0.00            | -0.25, 0.25 | .993     |
| Environmental Performance Index                      | 0.61             | 0.36, 0.87  | <.001    |
| <b>Random Effects</b>                                |                  |             |          |
| Residual                                             | 1.00             |             |          |
| Country (intercept)                                  | 0.64             |             |          |
| ICC                                                  | .39              |             |          |
| N (Country)                                          | 41               |             |          |
| Observations                                         | 6190             |             |          |
| Marginal R <sup>2</sup> / Conditional R <sup>2</sup> | .195 / .508      |             |          |

**Table S19.** Relationship between social mindfulness and Hofstede's power distance.

| <b>Social Mindfulness</b> |                  |           |          |
|---------------------------|------------------|-----------|----------|
| <i>Predictors</i>         | <i>Estimates</i> | <i>CI</i> | <i>p</i> |



|                           |       |              |      |
|---------------------------|-------|--------------|------|
| (Intercept)               | 0.01  | -0.28, 0.31  | .925 |
| Hofstede's power distance | -0.42 | -0.72, -0.12 | .008 |

**Random Effects**

|                                                      |             |
|------------------------------------------------------|-------------|
| Residual                                             | 1.00        |
| Country (intercept)                                  | 0.86        |
| ICC                                                  | .46         |
| N (Country)                                          | 40          |
| <hr/>                                                |             |
| Observations                                         | 6127        |
| Marginal R <sup>2</sup> / Conditional R <sup>2</sup> | .079 / .504 |

**Table S20.** Relationship between social mindfulness and Hofstede's individualism.

| <i>Predictors</i>        | <b>Social Mindfulness</b> |             |          |
|--------------------------|---------------------------|-------------|----------|
|                          | <i>Estimates</i>          | <i>CI</i>   | <i>p</i> |
| (Intercept)              | 0.01                      | -0.29, 0.32 | .928     |
| Hofstede's individualism | 0.35                      | 0.04, 0.66  | .030     |

**Random Effects**

|                                                      |             |
|------------------------------------------------------|-------------|
| Residual                                             | 1.00        |
| Country (intercept)                                  | 0.91        |
| ICC                                                  | .48         |
| N (Country)                                          | 40          |
| <hr/>                                                |             |
| Observations                                         | 6127        |
| Marginal R <sup>2</sup> / Conditional R <sup>2</sup> | .057 / .507 |

**Table S21.** Relationship between social mindfulness and Hofstede's masculinity.

| <i>Predictors</i>      | <b>Social Mindfulness</b> |             |          |
|------------------------|---------------------------|-------------|----------|
|                        | <i>Estimates</i>          | <i>CI</i>   | <i>p</i> |
| (Intercept)            | 0.01                      | -0.31, 0.34 | .931     |
| Hofstede's masculinity | 0.06                      | -0.27, 0.39 | .706     |

**Random Effects**

|                                                      |             |
|------------------------------------------------------|-------------|
| Residual                                             | 1.00        |
| Country (intercept)                                  | 1.03        |
| ICC                                                  | .51         |
| N (Country)                                          | 40          |
| <hr/>                                                |             |
| Observations                                         | 6127        |
| Marginal R <sup>2</sup> / Conditional R <sup>2</sup> | .002 / .509 |
| <hr/>                                                |             |

**Table S22.** Relationship between social mindfulness and Hofstede’s uncertainty avoidance.

| <i>Predictors</i>                | <b>Social Mindfulness</b> |             |          |
|----------------------------------|---------------------------|-------------|----------|
|                                  | <i>Estimates</i>          | <i>CI</i>   | <i>p</i> |
| (Intercept)                      | 0.01                      | -0.31, 0.34 | .930     |
| Hofstede’s uncertainty avoidance | 0.15                      | -0.18, 0.47 | .376     |

**Random Effects**

|                                                      |             |
|------------------------------------------------------|-------------|
| Residual                                             | 1.00        |
| Country (intercept)                                  | 1.02        |
| ICC                                                  | .50         |
| N (Country)                                          | 40          |
| <hr/>                                                |             |
| Observations                                         | 6127        |
| Marginal R <sup>2</sup> / Conditional R <sup>2</sup> | .009 / .509 |
| <hr/>                                                |             |

**Table S23.** Relationship between social mindfulness and Hofstede’s long-term orientation.

| <i>Predictors</i>                | <b>Social Mindfulness</b> |             |          |
|----------------------------------|---------------------------|-------------|----------|
|                                  | <i>Estimates</i>          | <i>CI</i>   | <i>p</i> |
| (Intercept)                      | 0.01                      | -0.30, 0.32 | .954     |
| Hofstede’s long-term orientation | 0.38                      | 0.07, 0.70  | .019     |

**Random Effects**

|                     |      |
|---------------------|------|
| Residual            | 1.00 |
| Country (intercept) | 0.91 |
| ICC                 | .48  |

|                                                      |             |
|------------------------------------------------------|-------------|
| N (Country)                                          | 39          |
| Observations                                         | 6001        |
| Marginal R <sup>2</sup> / Conditional R <sup>2</sup> | .072 / .515 |

**Table S24.** Relationship between social mindfulness and Hofstede's indulgence.

| <b>Social Mindfulness</b>                            |                  |             |          |
|------------------------------------------------------|------------------|-------------|----------|
| <i>Predictors</i>                                    | <i>Estimates</i> | <i>CI</i>   | <i>p</i> |
| (Intercept)                                          | 0.01             | -0.33, 0.34 | .958     |
| Hofstede's indulgence                                | -0.06            | -0.40, 0.28 | .720     |
| <b>Random Effects</b>                                |                  |             |          |
| Residual                                             | 1.00             |             |          |
| Country (intercept)                                  | 1.06             |             |          |
| ICC                                                  | .51              |             |          |
| N (Country)                                          | 39               |             |          |
| Observations                                         | 6001             |             |          |
| Marginal R <sup>2</sup> / Conditional R <sup>2</sup> | .002 / .515      |             |          |

**Table S25.** Relationship between social mindfulness and GNI per capita.

| <b>Social Mindfulness</b>                            |                  |             |          |
|------------------------------------------------------|------------------|-------------|----------|
| <i>Predictors</i>                                    | <i>Estimates</i> | <i>CI</i>   | <i>p</i> |
| (Intercept)                                          | -0.00            | -0.29, 0.29 | .993     |
| GNI Per Capita                                       | 0.40             | 0.11, 0.70  | .009     |
| <b>Random Effects</b>                                |                  |             |          |
| Residual                                             | 1.00             |             |          |
| Country (intercept)                                  | 0.85             |             |          |
| ICC                                                  | .46              |             |          |
| N (Country)                                          | 41               |             |          |
| Observations                                         | 6190             |             |          |
| Marginal R <sup>2</sup> / Conditional R <sup>2</sup> | .086 / .507      |             |          |

**Table S26.** Relationship between social mindfulness and GDP per capita.

| <b>Social Mindfulness</b>                            |                  |             |          |
|------------------------------------------------------|------------------|-------------|----------|
| <i>Predictors</i>                                    | <i>Estimates</i> | <i>CI</i>   | <i>p</i> |
| (Intercept)                                          | -0.00            | -0.29, 0.29 | .993     |
| GDP Per Capita                                       | 0.40             | 0.10, 0.70  | .009     |
| <b>Random Effects</b>                                |                  |             |          |
| Residual                                             | 1.00             |             |          |
| Country (intercept)                                  | 0.85             |             |          |
| ICC                                                  | .46              |             |          |
| N (Country)                                          | 41               |             |          |
| Observations                                         | 6190             |             |          |
| Marginal R <sup>2</sup> / Conditional R <sup>2</sup> | .085 / .506      |             |          |

**Table S27.** Relationship between social mindfulness and Gini index.

| <b>Social Mindfulness</b>                            |                  |              |          |
|------------------------------------------------------|------------------|--------------|----------|
| <i>Predictors</i>                                    | <i>Estimates</i> | <i>CI</i>    | <i>p</i> |
| (Intercept)                                          | -0.00            | -0.29, 0.29  | .996     |
| Gini Index                                           | -0.42            | -0.71, -0.12 | .007     |
| <b>Random Effects</b>                                |                  |              |          |
| Residual                                             | 1.00             |              |          |
| Country (intercept)                                  | 0.84             |              |          |
| ICC                                                  | .46              |              |          |
| N (Country)                                          | 41               |              |          |
| Observations                                         | 6190             |              |          |
| Marginal R <sup>2</sup> / Conditional R <sup>2</sup> | .104 / .514      |              |          |

**Supplementary Materials 8: Full model results for Part 2**

**Table S28.** Relationship between social mindfulness and moral expansiveness.

| <i>Predictors</i>                                    | <b>Social Mindfulness</b> |              |          |
|------------------------------------------------------|---------------------------|--------------|----------|
|                                                      | <i>Estimates</i>          | <i>CI</i>    | <i>p</i> |
| (Intercept)                                          | 0.01                      | -0.31, 0.33  | .940     |
| Moral expansiveness (between countries)              | -0.02                     | -0.34, 0.30  | .898     |
| Moral expansiveness (within countries)               | 0.07                      | 0.05, 0.10   | <.001    |
| Age                                                  | 0.01                      | -0.02, 0.04  | .383     |
| Gender (female)                                      | -0.02                     | -0.08, 0.04  | .447     |
| Social conservatism                                  | -0.01                     | -0.04, 0.02  | .459     |
| Economic conservatism                                | -0.03                     | -0.07, -0.00 | .032     |
| <b>Random Effects</b>                                |                           |              |          |
| Residual                                             | 0.99                      |              |          |
| Country (intercept)                                  | 1.01                      |              |          |
| ICC                                                  | .50                       |              |          |
| N (Country)                                          | 41                        |              |          |
| Observations                                         | 6000                      |              |          |
| Marginal R <sup>2</sup> / Conditional R <sup>2</sup> | .004 / .505               |              |          |

**Table S29.** Relationship between social mindfulness and moral expansiveness for nature.

| <i>Predictors</i>                                  | <b>Social Mindfulness</b> |             |          |
|----------------------------------------------------|---------------------------|-------------|----------|
|                                                    | <i>Estimates</i>          | <i>CI</i>   | <i>p</i> |
| (Intercept)                                        | 0.01                      | -0.31, 0.33 | .950     |
| Moral expansiveness for nature (between countries) | -0.15                     | -0.47, 0.17 | .351     |
| Moral expansiveness for nature (within countries)  | 0.05                      | 0.02, 0.07  | <.001    |
| Age                                                | 0.02                      | -0.02, 0.05 | .324     |

|                                                      |             |              |      |
|------------------------------------------------------|-------------|--------------|------|
| Gender (female)                                      | -0.02       | -0.08, 0.04  | .513 |
| Social conservatism                                  | -0.01       | -0.04, 0.02  | .452 |
| Economic conservatism                                | -0.04       | -0.07, -0.00 | .023 |
| <b>Random Effects</b>                                |             |              |      |
| Residual                                             | 1.00        |              |      |
| Country (intercept)                                  | 0.98        |              |      |
| ICC                                                  | .49         |              |      |
| N (Country)                                          | 41          |              |      |
| Observations                                         | 6052        |              |      |
| Marginal R <sup>2</sup> / Conditional R <sup>2</sup> | .012 / .501 |              |      |

**Table S30.** Relationship between social mindfulness and negative attitudes towards immigrants.

| <i>Predictors</i>                                   | <b>Social Mindfulness</b> |              |          |
|-----------------------------------------------------|---------------------------|--------------|----------|
|                                                     | <i>Estimates</i>          | <i>CI</i>    | <i>p</i> |
| (Intercept)                                         | 0.01                      | -0.25, 0.28  | .922     |
| Attitudes towards immigrants<br>(between countries) | -0.58                     | -0.85, -0.32 | <.001    |
| Attitudes towards immigrants<br>(within countries)  | -0.10                     | -0.12, -0.07 | <.001    |
| Age                                                 | 0.02                      | -0.01, 0.05  | .219     |
| Gender (female)                                     | -0.02                     | -0.08, 0.03  | .428     |
| Social conservatism                                 | 0.01                      | -0.02, 0.05  | .415     |
| Economic conservatism                               | -0.02                     | -0.05, 0.01  | .136     |
| <b>Random Effects</b>                               |                           |              |          |
| Residual                                            | 0.99                      |              |          |
| Country (intercept)                                 | 0.67                      |              |          |
| ICC                                                 | .40                       |              |          |
| N (Country)                                         | 41                        |              |          |
| Observations                                        | 6080                      |              |          |

Marginal R<sup>2</sup> / Conditional R<sup>2</sup> .182 / .512

**Table S31.** Relationship between social mindfulness and Schwarz universalism value.

| <i>Predictors</i>                                    | <b>Social Mindfulness</b> |              |          |
|------------------------------------------------------|---------------------------|--------------|----------|
|                                                      | <i>Estimates</i>          | <i>CI</i>    | <i>p</i> |
| (Intercept)                                          | 0.02                      | -0.30, 0.33  | .922     |
| Universalism value (between countries)               | -0.07                     | -0.39, 0.25  | .679     |
| Universalism value (within countries)                | 0.03                      | 0.00, 0.06   | .019     |
| Age                                                  | 0.02                      | -0.01, 0.05  | .262     |
| Gender (female)                                      | -0.02                     | -0.08, 0.03  | .406     |
| Social conservatism                                  | -0.01                     | -0.04, 0.02  | .524     |
| Economic conservatism                                | -0.03                     | -0.07, -0.00 | .030     |
| <b>Random Effects</b>                                |                           |              |          |
| Residual                                             | 1.00                      |              |          |
| Country (intercept)                                  | 1.00                      |              |          |
| ICC                                                  | .50                       |              |          |
| N (Country)                                          | 41                        |              |          |
| Observations                                         | 6066                      |              |          |
| Marginal R <sup>2</sup> / Conditional R <sup>2</sup> | .003 / .502               |              |          |

**Table S32.** Relationship between social mindfulness and anomie.

| <i>Predictors</i>          | <b>Social Mindfulness</b> |              |          |
|----------------------------|---------------------------|--------------|----------|
|                            | <i>Estimates</i>          | <i>CI</i>    | <i>p</i> |
| (Intercept)                | 0.01                      | -0.30, 0.32  | .958     |
| Anomie (between countries) | -0.21                     | -0.52, 0.10  | .180     |
| Anomie (within countries)  | -0.03                     | -0.06, -0.01 | .017     |
| Age                        | 0.02                      | -0.01, 0.05  | .301     |
| Gender (female)            | -0.02                     | -0.08, 0.04  | .583     |

|                       |       |              |      |
|-----------------------|-------|--------------|------|
| Social conservatism   | -0.01 | -0.04, 0.02  | .419 |
| Economic conservatism | -0.04 | -0.07, -0.01 | .013 |

**Random Effects**

|                                                      |             |
|------------------------------------------------------|-------------|
| Residual                                             | 1.00        |
| Country (intercept)                                  | 0.95        |
| ICC                                                  | .49         |
| N (Country)                                          | 41          |
| <hr/>                                                |             |
| Observations                                         | 6055        |
| Marginal R <sup>2</sup> / Conditional R <sup>2</sup> | .023 / .500 |

**Table S33.** Relationship between social mindfulness and anomie in the social fabric.

| <i>Predictors</i>                                      | <b>Social Mindfulness</b> |              |          |
|--------------------------------------------------------|---------------------------|--------------|----------|
|                                                        | <i>Estimates</i>          | <i>CI</i>    | <i>p</i> |
| (Intercept)                                            | 0.01                      | -0.29, 0.31  | .957     |
| Anomie within the social fabric<br>(between countries) | -0.33                     | -0.63, -0.03 | .034     |
| Anomie within the social fabric<br>(within countries)  | -0.03                     | -0.06, -0.01 | .010     |
| Age                                                    | 0.02                      | -0.01, 0.05  | .292     |
| Gender (female)                                        | -0.02                     | -0.08, 0.04  | .586     |
| Social conservatism                                    | -0.01                     | -0.04, 0.02  | .494     |
| Economic conservatism                                  | -0.04                     | -0.07, -0.01 | .015     |
| <b>Random Effects</b>                                  |                           |              |          |
| Residual                                               | 1.00                      |              |          |
| Country (intercept)                                    | 0.89                      |              |          |
| ICC                                                    | .47                       |              |          |
| N (Country)                                            | 41                        |              |          |
| <hr/>                                                  |                           |              |          |
| Observations                                           | 6071                      |              |          |
| Marginal R <sup>2</sup> / Conditional R <sup>2</sup>   | .057 / .501               |              |          |



**Table S34.** Relationship between social mindfulness and anomie in leadership.

| <i>Predictors</i>                                    | <b>Social Mindfulness</b> |              |          |
|------------------------------------------------------|---------------------------|--------------|----------|
|                                                      | <i>Estimates</i>          | <i>CI</i>    | <i>p</i> |
| (Intercept)                                          | 0.01                      | -0.31, 0.33  | .961     |
| Anomie within leadership (between countries)         | -0.11                     | -0.43, 0.21  | .488     |
| Anomie within leadership (within countries)          | -0.02                     | -0.05, 0.00  | .112     |
| Age                                                  | 0.02                      | -0.01, 0.05  | .273     |
| Gender (female)                                      | -0.02                     | -0.08, 0.04  | .565     |
| Social conservatism                                  | -0.01                     | -0.05, 0.02  | .385     |
| Economic conservatism                                | -0.04                     | -0.07, -0.01 | .012     |
| <b>Random Effects</b>                                |                           |              |          |
| Residual                                             | 1.00                      |              |          |
| Country (intercept)                                  | 0.98                      |              |          |
| ICC                                                  | .50                       |              |          |
| N (Country)                                          | 41                        |              |          |
| Observations                                         | 6069                      |              |          |
| Marginal R <sup>2</sup> / Conditional R <sup>2</sup> | .007 / .500               |              |          |

**Table S35.** Relationship between social mindfulness and Schwarz benevolence value.

| <i>Predictors</i>                     | <b>Social Mindfulness</b> |             |          |
|---------------------------------------|---------------------------|-------------|----------|
|                                       | <i>Estimates</i>          | <i>CI</i>   | <i>p</i> |
| (Intercept)                           | 0.01                      | -0.31, 0.33 | .928     |
| Benevolence value (between countries) | -0.04                     | -0.36, 0.28 | .819     |
| Benevolence value (within countries)  | 0.05                      | 0.03, 0.08  | <.001    |
| Age                                   | 0.02                      | -0.01, 0.05 | .308     |
| Gender (female)                       | -0.03                     | -0.08, 0.03 | .404     |

|                       |       |              |      |
|-----------------------|-------|--------------|------|
| Social conservatism   | -0.02 | -0.05, 0.02  | .333 |
| Economic conservatism | -0.04 | -0.07, -0.00 | .025 |

**Random Effects**

|                                                      |             |
|------------------------------------------------------|-------------|
| Residual                                             | 0.99        |
| Country (intercept)                                  | 1.00        |
| ICC                                                  | .50         |
| N (Country)                                          | 41          |
| <hr/>                                                |             |
| Observations                                         | 6056        |
| Marginal R <sup>2</sup> / Conditional R <sup>2</sup> | .003 / .503 |
| <hr/>                                                |             |

**Table S36.** Relationship between social mindfulness and environmental care.

| <i>Predictors</i>                                    | <b>Social Mindfulness</b> |              |          |
|------------------------------------------------------|---------------------------|--------------|----------|
|                                                      | <i>Estimates</i>          | <i>CI</i>    | <i>p</i> |
| (Intercept)                                          | 0.11                      | -0.19, 0.41  | .463     |
| Environmental care                                   | 0.41                      | 0.10, 0.71   | .010     |
| Age                                                  | 0.01                      | -0.02, 0.04  | .455     |
| Gender (female)                                      | -0.02                     | -0.08, 0.05  | .570     |
| Social conservatism                                  | -0.03                     | -0.07, 0.00  | .060     |
| Economic conservatism                                | -0.04                     | -0.07, -0.00 | .036     |
| <b>Random Effects</b>                                |                           |              |          |
| Residual                                             | 1.00                      |              |          |
| Country (intercept)                                  | 0.74                      |              |          |
| ICC                                                  | .43                       |              |          |
| N (Country)                                          | 35                        |              |          |
| <hr/>                                                |                           |              |          |
| Observations                                         | 5154                      |              |          |
| Marginal R <sup>2</sup> / Conditional R <sup>2</sup> | .098 / .482               |              |          |
| <hr/>                                                |                           |              |          |

**Table S37.** Relationship between social mindfulness and tolerance for minorities as neighbors.

| <b>Social Mindfulness</b>                            |                  |             |          |
|------------------------------------------------------|------------------|-------------|----------|
| <i>Predictors</i>                                    | <i>Estimates</i> | <i>CI</i>   | <i>p</i> |
| (Intercept)                                          | -0.05            | -0.35, 0.26 | .755     |
| Tolerance for minorities                             | 0.58             | 0.27, 0.88  | .001     |
| Age                                                  | 0.03             | -0.01, 0.06 | .108     |
| Gender (female)                                      | -0.02            | -0.09, 0.04 | .481     |
| Social conservatism                                  | -0.02            | -0.06, 0.01 | .178     |
| Economic conservatism                                | -0.03            | -0.06, 0.00 | .066     |
| <b>Random Effects</b>                                |                  |             |          |
| Residual                                             | 1.00             |             |          |
| Country (intercept)                                  | 0.76             |             |          |
| ICC                                                  | .43              |             |          |
| N (Country)                                          | 35               |             |          |
| Observations                                         | 5278             |             |          |
| Marginal R <sup>2</sup> / Conditional R <sup>2</sup> | .151 / .517      |             |          |

**Table S38.** Relationship between social mindfulness and valuing tolerance/respect as a child quality.

| <b>Social Mindfulness</b>        |                  |             |          |
|----------------------------------|------------------|-------------|----------|
| <i>Predictors</i>                | <i>Estimates</i> | <i>CI</i>   | <i>p</i> |
| (Intercept)                      | -0.05            | -0.40, 0.30 | .790     |
| Child quality: tolerance/respect | 0.29             | -0.06, 0.65 | .101     |
| Age                              | 0.03             | -0.01, 0.06 | .101     |
| Gender (female)                  | -0.02            | -0.09, 0.04 | .479     |
| Social conservatism              | -0.02            | -0.06, 0.01 | .181     |
| Economic conservatism            | -0.03            | -0.06, 0.00 | .065     |
| <b>Random Effects</b>            |                  |             |          |
| Residual                         | 1.00             |             |          |
| Country (intercept)              | 1.01             |             |          |

|                                                      |             |
|------------------------------------------------------|-------------|
| ICC                                                  | .50         |
| N (Country)                                          | 35          |
| Observations                                         | 5278        |
| Marginal R <sup>2</sup> / Conditional R <sup>2</sup> | .042 / .525 |

**Table S39.** Relationship between social mindfulness and trust.

| <b>Social Mindfulness</b>                            |                  |              |          |
|------------------------------------------------------|------------------|--------------|----------|
| <i>Predictors</i>                                    | <i>Estimates</i> | <i>CI</i>    | <i>p</i> |
| (Intercept)                                          | -0.04            | -0.36, 0.29  | .828     |
| Trust                                                | 0.33             | 0.00, 0.66   | .049     |
| Age                                                  | 0.02             | -0.01, 0.05  | .261     |
| Gender (female)                                      | -0.01            | -0.07, 0.05  | .751     |
| Social conservatism                                  | -0.02            | -0.05, 0.02  | .320     |
| Economic conservatism                                | -0.04            | -0.07, -0.01 | .011     |
| <b>Random Effects</b>                                |                  |              |          |
| Residual                                             | 1.00             |              |          |
| Country (intercept)                                  | 0.94             |              |          |
| ICC                                                  | .48              |              |          |
| N (Country)                                          | 37               |              |          |
| Observations                                         | 5576             |              |          |
| Marginal R <sup>2</sup> / Conditional R <sup>2</sup> | .058 / .515      |              |          |

**Table S40.** Relationship between social mindfulness and social capital index.

| <b>Social Mindfulness</b> |                  |             |          |
|---------------------------|------------------|-------------|----------|
| <i>Predictors</i>         | <i>Estimates</i> | <i>CI</i>   | <i>p</i> |
| (Intercept)               | 0.01             | -0.25, 0.27 | .948     |
| Social Capital Index      | 0.58             | 0.31, 0.84  | <.001    |
| Age                       | 0.02             | -0.01, 0.05 | .258     |
| Gender (female)           | -0.02            | -0.08, 0.04 | .534     |

|                       |       |              |      |
|-----------------------|-------|--------------|------|
| Social conservatism   | -0.01 | -0.04, 0.02  | .418 |
| Economic conservatism | -0.04 | -0.07, -0.01 | .016 |

**Random Effects**

|                                                      |             |
|------------------------------------------------------|-------------|
| Residual                                             | 1.00        |
| Country (intercept)                                  | 0.66        |
| ICC                                                  | .40         |
| N (Country)                                          | 41          |
| Observations                                         | 6089        |
| Marginal R <sup>2</sup> / Conditional R <sup>2</sup> | .181 / .506 |

**Table S41.** Relationship between social mindfulness and collective action.

| <i>Predictors</i>     | <b>Social Mindfulness</b> |             |          |
|-----------------------|---------------------------|-------------|----------|
|                       | <i>Estimates</i>          | <i>CI</i>   | <i>p</i> |
| (Intercept)           | -0.07                     | -0.40, 0.27 | .684     |
| Collective action     | 0.47                      | 0.13, 0.80  | .008     |
| Age                   | 0.03                      | -0.00, 0.06 | .081     |
| Gender (female)       | -0.03                     | -0.09, 0.03 | .375     |
| Social conservatism   | -0.02                     | -0.06, 0.01 | .153     |
| Economic conservatism | -0.03                     | -0.06, 0.00 | .093     |

**Random Effects**

|                                                      |             |
|------------------------------------------------------|-------------|
| Residual                                             | 1.00        |
| Country (intercept)                                  | 0.89        |
| ICC                                                  | .47         |
| N (Country)                                          | 34          |
| Observations                                         | 5176        |
| Marginal R <sup>2</sup> / Conditional R <sup>2</sup> | .114 / .531 |

**Table S42.** Relationship between social mindfulness and citizenship index.

**Social Mindfulness**

| <i>Predictors</i>                                    | <i>Estimates</i> | <i>CI</i>    | <i>p</i> |
|------------------------------------------------------|------------------|--------------|----------|
| (Intercept)                                          | 0.11             | -0.19, 0.41  | .460     |
| Citizenship index                                    | 0.42             | 0.12, 0.72   | .008     |
| Age                                                  | 0.01             | -0.02, 0.04  | .461     |
| Gender (female)                                      | -0.02            | -0.08, 0.05  | .567     |
| Social conservatism                                  | -0.03            | -0.07, 0.00  | .061     |
| Economic conservatism                                | -0.04            | -0.07, -0.00 | .036     |
| <b>Random Effects</b>                                |                  |              |          |
| Residual                                             | 1.00             |              |          |
| Country (intercept)                                  | 0.73             |              |          |
| ICC                                                  | .42              |              |          |
| N (Country)                                          | 35               |              |          |
| Observations                                         | 5154             |              |          |
| Marginal R <sup>2</sup> / Conditional R <sup>2</sup> | .097 / .479      |              |          |

**Table S43.** Relationship between social mindfulness and voice and accountability of the people.

| <i>Predictors</i>                  | <b>Social Mindfulness</b> |              |          |
|------------------------------------|---------------------------|--------------|----------|
|                                    | <i>Estimates</i>          | <i>CI</i>    | <i>p</i> |
| (Intercept)                        | -0.01                     | -0.30, 0.28  | .947     |
| Voice and accountability of people | 0.48                      | 0.20, 0.77   | .002     |
| Age                                | 0.02                      | -0.02, 0.05  | .319     |
| Gender (female)                    | -0.02                     | -0.08, 0.04  | .611     |
| Social conservatism                | -0.02                     | -0.05, 0.02  | .358     |
| Economic conservatism              | -0.04                     | -0.07, -0.01 | .012     |
| <b>Random Effects</b>              |                           |              |          |
| Residual                           | 1.00                      |              |          |
| Country (intercept)                | 0.76                      |              |          |
| ICC                                | .43                       |              |          |

|                                                      |             |
|------------------------------------------------------|-------------|
| N (Country)                                          | 39          |
| Observations                                         | 5811        |
| Marginal R <sup>2</sup> / Conditional R <sup>2</sup> | .130 / .507 |

**Table S44.** Relationship between social mindfulness and valuing unselfishness as a child quality.

| <i>Predictors</i>                                    | <b>Social Mindfulness</b> |             |          |
|------------------------------------------------------|---------------------------|-------------|----------|
|                                                      | <i>Estimates</i>          | <i>CI</i>   | <i>p</i> |
| (Intercept)                                          | -0.05                     | -0.41, 0.31 | .795     |
| Child quality: Unselfishness                         | 0.14                      | -0.22, 0.51 | .437     |
| Age                                                  | 0.03                      | -0.01, 0.06 | .100     |
| Gender (female)                                      | -0.02                     | -0.09, 0.04 | .483     |
| Social conservatism                                  | -0.02                     | -0.06, 0.01 | .178     |
| Economic conservatism                                | -0.03                     | -0.06, 0.00 | .065     |
| <b>Random Effects</b>                                |                           |             |          |
| Residual                                             | 1.00                      |             |          |
| Country (intercept)                                  | 1.08                      |             |          |
| ICC                                                  | .52                       |             |          |
| N (Country)                                          | 35                        |             |          |
| Observations                                         | 5278                      |             |          |
| Marginal R <sup>2</sup> / Conditional R <sup>2</sup> | .010 / .525               |             |          |

## Supplementary Materials 9: Within-Country and Between-Country Correlations for Part 2

**Table S45.** Within-country correlations

| <i>Variable</i>               | 1        | 2        | 3       | 4        | 5       | 6       | 7       | 8    | 9    |
|-------------------------------|----------|----------|---------|----------|---------|---------|---------|------|------|
| 1. Social Mindfulness         | 1.00     |          |         |          |         |         |         |      |      |
| 2. MES                        | 0.07***  | 1.00     |         |          |         |         |         |      |      |
| 3. MES environment            | 0.05***  | 0.81***  | 1.00    |          |         |         |         |      |      |
| 4. Attitude toward immigrants | -0.09*** | -0.08*** | -0.02   | 1.00     |         |         |         |      |      |
| 5. Universalism value         | 0.04**   | 0.17***  | 0.13*** | -0.17*** | 1.00    |         |         |      |      |
| 6. Anomie                     | -0.03*   | -0.02    | 0.04**  | 0.03**   | 0.06*** | 1.00    |         |      |      |
| 7. Anomie in social fabric    | -0.04**  | -0.03*   | 0.01    | 0.11***  | 0.04**  | 0.79*** | 1.00    |      |      |
| 8. Anomie in leadership       | -0.02    | -0.00    | 0.05*** | -0.05*** | 0.06*** | 0.82*** | 0.31*** | 1.00 |      |
| 9. Benevolence value          | 0.05***  | 0.06***  | 0.01    | -0.08*** | 0.42*** | 0.03**  | 0.04**  | 0.01 | 1.00 |

\*  $p < .05$

\*\*  $p < .01$

\*\*\*  $p < .001$



**Table S46. Between-country correlations**

| <i>Variable</i>                    | 1            | 2           | 3            | 4            | 5            | 6            | 7            | 8            | 9           | 10          | 11         | 12   | 13         | 14   | 15 | 16 | 17 | 18 |
|------------------------------------|--------------|-------------|--------------|--------------|--------------|--------------|--------------|--------------|-------------|-------------|------------|------|------------|------|----|----|----|----|
| 1. Social Mindfulness              | 1.00         |             |              |              |              |              |              |              |             |             |            |      |            |      |    |    |    |    |
| 2. MES                             | -0.06        | 1.00        |              |              |              |              |              |              |             |             |            |      |            |      |    |    |    |    |
| 3. MES environment                 | -0.18        | 0.85<br>*** | 1.00         |              |              |              |              |              |             |             |            |      |            |      |    |    |    |    |
| 4. Attitude toward immigrants      | -0.57<br>*** | -0.10       | 0.13         | 1.00         |              |              |              |              |             |             |            |      |            |      |    |    |    |    |
| 5. Universalism value              | -0.12        | 0.64<br>*** | 0.64<br>***  | -0.12        | 1.00         |              |              |              |             |             |            |      |            |      |    |    |    |    |
| 6. Anomie                          | -0.22        | 0.26        | 0.36<br>*    | -0.04        | 0.58<br>***  | 1.00         |              |              |             |             |            |      |            |      |    |    |    |    |
| 7. Anomie in social fabric         | -0.35<br>*   | 0.28        | 0.43<br>**   | 0.14         | 0.63<br>***  | 0.93<br>***  | 1.00         |              |             |             |            |      |            |      |    |    |    |    |
| 8. Anomie in leadership            | -0.11        | 0.22        | 0.28         | -0.17        | 0.49<br>**   | 0.96<br>***  | 0.80<br>***  | 1.00         |             |             |            |      |            |      |    |    |    |    |
| 9. Benevolence value               | -0.12        | 0.48<br>**  | 0.42<br>**   | -0.28        | 0.78<br>***  | 0.39<br>*    | 0.44<br>**   | 0.32<br>*    | 1.00        |             |            |      |            |      |    |    |    |    |
| 10. Care for environment           | 0.44<br>**   | -0.14       | -0.36<br>*   | -0.36<br>*   | -0.29        | -0.56<br>*** | -0.66<br>*** | -0.43<br>**  | -0.14       | 1.00        |            |      |            |      |    |    |    |    |
| 11. Tolerance for minorities       | 0.63<br>***  | -0.13       | -0.25        | -0.67<br>*** | 0.14         | -0.04        | -0.19        | 0.06         | 0.13        | 0.37<br>*   | 1.00       |      |            |      |    |    |    |    |
| 12. Child value: tolerance/respect | 0.27         | 0.06        | -0.02        | -0.41<br>*   | 0.01         | -0.15        | -0.29        | -0.04        | 0.01        | 0.61<br>*** | 0.51<br>** | 1.00 |            |      |    |    |    |    |
| 13. Trust                          | 0.33<br>*    | -0.34<br>*  | -0.52<br>*** | -0.11        | -0.63<br>*** | -0.79<br>*** | -0.79<br>*** | -0.72<br>*** | -0.50<br>** | 0.60<br>*** | 0.13       | 0.18 | 1.00       |      |    |    |    |    |
| 14. Social capital                 | 0.64<br>***  | -0.19       | -0.22        | -0.11        | -0.38<br>*   | -0.56<br>*** | -0.59<br>*** | -0.48<br>**  | -0.28       | 0.58<br>*** | 0.31       | 0.25 | 0.49<br>** | 1.00 |    |    |    |    |

|                                |            |       |             |              |       |             |              |            |       |             |             |             |             |             |             |             |      |      |
|--------------------------------|------------|-------|-------------|--------------|-------|-------------|--------------|------------|-------|-------------|-------------|-------------|-------------|-------------|-------------|-------------|------|------|
| 15. Collective action          | 0.49<br>** | -0.29 | -0.49<br>** | -0.68<br>*** | -0.24 | -0.12       | -0.32        | 0.03       | -0.04 | 0.65<br>*** | 0.62<br>*** | 0.57<br>*** | 0.38<br>*   | 0.34<br>*   | 1.00        |             |      |      |
| 16. Citizenship                | 0.49<br>** | -0.18 | -0.45<br>** | -0.57<br>*** | -0.28 | -0.50<br>** | -0.65<br>*** | -0.35<br>* | -0.11 | 0.89<br>*** | 0.59<br>*** | 0.64<br>*** | 0.61<br>*** | 0.57<br>*** | 0.85<br>*** | 1.00        |      |      |
| 17. Voice and accountability   | 0.47<br>** | -0.12 | -0.38<br>*  | -0.69<br>*** | -0.11 | -0.09       | -0.24        | 0.03       | 0.09  | 0.64<br>*** | 0.61<br>*** | 0.52<br>*** | 0.22        | 0.32<br>*   | 0.74<br>*** | 0.71<br>*** | 1.00 |      |
| 18. Child value: Unselfishness | 0.17       | -0.17 | -0.07       | -0.30        | 0.04  | 0.05        | -0.08        | 0.13       | 0.05  | 0.30        | 0.43<br>**  | 0.54<br>*** | -0.10       | -0.02       | 0.33        | 0.33        | 0.21 | 1.00 |

\*  $p < .05$

\*\*  $p < .01$

\*\*\*  $p < .001$

**Supplementary Materials 10: Results for Linear Mixed Model Containing all Country Level Variables for Part 2**

Based on advice from reviewers, we placed all nine of our country-level variables from Part 2 in the same model (Table S47). We removed three variables that had an unacceptable Variation Inflation Factor (VIF) above 5 (Table S48). We then conducted a second model (Table S49) with the remaining 6 country-level variables. We found that greater tolerance for minorities as neighbors and greater social capital were associated with social mindfulness. This suggests that many of our constructs may broadly reflect social capital and a tolerance for outgroup members.

**Table S47.** First Model Examining the Effect of Nine Country-Level Variables on Social Mindfulness

| <i>Predictors</i>                                    | <b>Social Mindfulness</b> |             |          |
|------------------------------------------------------|---------------------------|-------------|----------|
|                                                      | <i>Estimates</i>          | <i>CI</i>   | <i>p</i> |
| (Intercept)                                          | -0.03                     | -0.34, 0.29 | .865     |
| Care for the environment                             | 0.16                      | -0.63, 0.96 | .669     |
| Tolerance for minorities as neighbors                | 0.84                      | 0.33, 1.36  | .003     |
| Child quality: Tolerance/respect                     | 0.02                      | -0.44, 0.48 | .920     |
| Trust                                                | 0.45                      | -0.04, 0.93 | .068     |
| Social capital                                       | 0.55                      | 0.10, 0.99  | .018     |
| Collective action                                    | 0.20                      | -0.54, 0.94 | .571     |
| Citizenship Index                                    | -1.08                     | -2.30, 0.13 | .078     |
| Voice and accountability of people                   | 0.16                      | -0.37, 0.70 | .527     |
| Child quality: Unselfishness                         | -0.04                     | -0.42, 0.33 | .816     |
| <b>Random Effects</b>                                |                           |             |          |
| Residual                                             | 1.00                      |             |          |
| Country (intercept)                                  | 0.56                      |             |          |
| ICC                                                  | .36                       |             |          |
| N (Country)                                          | 29                        |             |          |
| Observations                                         | 4474                      |             |          |
| Marginal R <sup>2</sup> / Conditional R <sup>2</sup> | .338 / .576               |             |          |

**Table S48.** Variance Inflation Factor for Nine Variables from Table S47.

| <b>Variable</b>                       | <b>VIF</b> |
|---------------------------------------|------------|
| Care for the environment              | 6.45       |
| Tolerance for minorities as neighbors | 3.02       |
| Child quality: Tolerance/respect      | 2.54       |
| Trust                                 | 2.61       |
| Social capital                        | 2.32       |
| Collective action                     | 6.77       |
| Citizenship Index                     | 15.90      |
| Voice and accountability of people    | 3.09       |
| Child quality: Unselfishness          | 1.72       |

**Table S49.** Second Model Examining the Effect of Six Country-Level Variables with Acceptable VIF on Social Mindfulness

| <i>Predictors</i>                                    | <b>Social Mindfulness</b> |             |          |
|------------------------------------------------------|---------------------------|-------------|----------|
|                                                      | <i>Estimates</i>          | <i>CI</i>   | <i>p</i> |
| (Intercept)                                          | -0.03                     | -0.31, 0.25 | .830     |
| Tolerance for minorities as neighbors                | 0.53                      | 0.14, 0.92  | .010     |
| Child quality: Tolerance/respect                     | -0.10                     | -0.48, 0.29 | .608     |
| Trust                                                | 0.05                      | -0.28, 0.37 | .772     |
| Social capital                                       | 0.49                      | 0.14, 0.83  | .007     |
| Voice and accountability of people                   | 0.07                      | -0.31, 0.44 | .721     |
| Child quality: Unselfishness                         | 0.05                      | -0.31, 0.40 | .787     |
| <b>Random Effects</b>                                |                           |             |          |
| Residual                                             | 1.00                      |             |          |
| Country (intercept)                                  | 0.61                      |             |          |
| ICC                                                  | .38                       |             |          |
| N (Country)                                          | 34                        |             |          |
| Observations                                         | 5246                      |             |          |
| Marginal R <sup>2</sup> / Conditional R <sup>2</sup> | .297 / .562               |             |          |

## References

1. Van Doesum, N. J., Van Lange, D. A. W. & Van Lange, P. A. M. Social mindfulness: Skill and will to navigate the social world. *J. Pers. Soc. Psychol.* **105**, 86–103 (2013).
2. Van Lange, P. A. M., Vinkhuyzen, A. A. E. & Posthuma, D. Genetic influences are virtually absent for trust. *PLoS One* **9**, e93880 (2014).
3. Goodman, E. *et al.* Adolescents' perceptions of social status: Development and evaluation of a new indicator. *Pediatrics* **108**, 1–8 (2001).
4. Inglehart, R. *et al.* *World Values Survey: Round Six - Country-Pooled Datafile*. Madrid, Spain & Vienna, Austria: JD Systems Institute & WVSA Secretariat. (2018) doi:doi.org/10.14281/18241.7.
5. EVS. *European Values Study: Integrated Dataset (EVS2017)*. GESIS Data Archive, Cologne. ZA7500 Data file Version 5.0.0 (2017) doi:10.4232/1.13560.
6. The World Bank. Worldwide Governance Indicators. (2019).
7. Economist Intelligence Unit. Democracy Index 2019: A year of democratic setbacks and popular protest. *The Economist* <https://www.eiu.com/n/campaigns/democracy-index-2020/> (2019).
8. Schwab, K. *The Global Competitiveness Report*. (2019).
9. Reporters Without Borders. World Press Freedom Index. <https://rsf.org/en/index> (2019).
10. Wendling, Z. A., Emerson, J. W., de Sherbinin, A. & Esty, D. C., *et al.* Environmental Performance Index. <https://epi.yale.edu> (2020).
11. Hofstede Insights. Compare Countries. <https://www.hofstede-insights.com/product/compare-countries/> (2020).
12. The World Bank. GNI per capita, Atlas method (current US\$). <https://data.worldbank.org/indicator/NY.GNP.PCAP.CD> (2019).
13. The World Bank. GDP per capita (current US\$). *The World Bank* <https://data.worldbank.org/indicator/NY.GDP.PCAP.CD> (2020).
14. World Factbook. Distribution of family income - Gini index. *World Factbook* <https://www.cia.gov/the-world-factbook/field/gini-index-coefficient-distribution-of-family-income/country-comparison> (2018).
15. Crimston, C. R., Bain, P. G., Hornsey, M. J. & Bastian, B. Moral expansiveness: Examining variability in the extension of the moral world. *J. Pers. Soc. Psychol.* **111**, 636–653 (2016).
16. Jetten, J., Mols, F. & Postmes, T. Relative deprivation and relative wealth enhances anti-immigrant sentiments: The V curve re-examined. *PLoS One* **10**, 1–24 (2015).
17. Schwartz, S. H. An overview of the Schwartz theory of basic values. *Online Readings Psychol. Cult.* **2**, 2307–0919 (2012).
18. Teymoori, A. *et al.* Revisiting the measurement of anomie. *PLoS One* **11**, 1–27 (2016).
19. Sprong, S. *et al.* “Our country needs a strong leader right now”: Economic inequality enhances the wish for a strong leader. *Psychol. Sci.* **30**, 1625–1637 (2019).
20. US News. Citizenship. <https://www.usnews.com/news/best-countries/citizenship-rankings> (2019).

21. Ortiz-Ospina, E. & Roser, M. Trust. *Our World In Data*  
<https://ourworldindata.org/trust> (2016).
22. Global Sustainable Competitiveness Index. Social Capital Index: World Map. <https://solability.com/the-global-sustainable-competitiveness-index/the-index/social-capital> (2020).
23. Kaufmann, D. & Kraay, A. Worldwide Governance Indicators.  
<http://info.worldbank.org/governance/wgi/> (2019).
